# Supplementary material
Source: PubMed Central journal article supplement (PMC7259528)
Supplement: jciinsight-5-130205-s169.pdf [file jciinsight-5-130205-s169.pdf]

|     |                                  |            |                             |          |      |   |          |          |          |          |          |          |          |          |       |       |
|-----|----------------------------------|------------|-----------------------------|----------|------|---|----------|----------|----------|----------|----------|----------|----------|----------|-------|-------|
| 158 | 5(S)-HETE                        | infilpd-07 | Additional Bioactive Lipids | 319.2252 | 3.08 | - | 1.08E+05 | 9.19E+04 | 2.14E+05 | 4.72E+04 | 4.99E+04 | 3.10E+04 | 1.08E+05 | 4.72E+04 | 0.438 | 0.070 |
| 159 | Arachidonic Acid                 | infilpd-10 | Additional Bioactive Lipids | 303.2325 | 2.67 | - | 2.85E+07 | 2.03E+07 | 1.93E+07 | 1.08E+07 | 1.02E+07 | 1.06E+07 | 2.03E+07 | 1.06E+07 | 0.522 | 0.014 |
| 160 | Acetyl phosphate                 | C00227     | Other                       | 138.9787 | 0.56 | - | 8.40E+04 | 1.22E+05 | 3.37E+04 | 5.93E+04 | 8.94E+04 | 6.22E+04 | 8.37E+04 | 6.22E+04 | 0.743 | 0.371 |
| 161 | Tracanthine                      | C08435     | Other                       | 204.1233 | 0.70 | + | 1.11E+08 | 1.11E+08 | 1.93E+08 | 1.78E+08 | 1.90E+08 | 1.63E+08 | 1.11E+08 | 1.78E+08 | 1.595 | 0.245 |
| 162 | 2-Methylene-glutarate            | C02930     | Other                       | 143.0335 | 0.72 | - | 4.99E+06 | 2.34E+06 | 3.27E+06 | 2.59E+06 | 3.84E+06 | 4.75E+06 | 3.27E+06 | 3.84E+06 | 1.177 | 0.857 |
| 163 | 6-Pyruvoyltetrahydropterin       | C03684     | Other                       | 236.0770 | 0.59 | - | 2.89E+05 | 2.89E+05 | 2.32E+05 | 1.89E+05 | 2.81E+05 | 2.14E+05 | 2.89E+05 | 2.14E+05 | 0.743 | 0.276 |
| 164 | beta-Butoxyethyl nicotinate      | C13138     | Other                       | 224.1265 | 0.91 | + | 2.46E+05 | 2.26E+05 | 2.80E+05 | 2.59E+05 | 2.47E+05 | 2.23E+05 | 2.46E+05 | 2.47E+05 | 1.007 | 0.877 |
| 165 | 3-Oxomalate                      | C01980     | Other                       | 207.0144 | 0.67 | + | 1.33E+06 | 9.95E+05 | 5.43E+05 | 6.45E+05 | 5.80E+05 | 5.24E+05 | 9.95E+05 | 5.80E+05 | 0.729 | 0.261 |
| 166 | 2-Deoxy-alpha-D-glucoside        | C03573     | Other                       | 164.0672 | 0.61 | + | 2.57E+06 | 3.14E+06 | 1.61E+06 | 2.55E+06 | 1.56E+06 | 1.88E+06 | 2.57E+06 | 1.88E+06 | 0.732 | 0.455 |
| 167 | cis-p-Coumarate                  | C06738     | Other                       | 165.0544 | 0.70 | + | 7.15E+05 | 3.53E+05 | 4.25E+05 | 6.88E+05 | 3.88E+05 | 6.56E+05 | 4.25E+05 | 6.56E+05 | 1.544 | 0.617 |
| 168 | N6-Methyl-L-lysine               | C02728     | Other                       | 161.1267 | 0.66 | + | 1.11E+06 | 1.45E+06 | 7.19E+05 | 1.34E+06 | 1.17E+06 | 1.25E+06 | 1.11E+06 | 1.25E+06 | 1.131 | 0.497 |
| 169 | D-Valcnon-1,5-lactone            | C00188     | Other                       | 177.0391 | 0.69 | - | 1.78E+06 | 9.39E+05 | 1.41E+06 | 1.90E+06 | 1.48E+06 | 2.01E+06 | 1.41E+06 | 1.48E+06 | 1.049 | 0.533 |
| 170 | D-Ribitol 5-phosphate            | C01068     | Other                       | 233.0423 | 0.70 | + | 7.48E+05 | 1.12E+06 | 1.02E+06 | 1.16E+06 | 1.45E+06 | 9.17E+05 | 1.02E+06 | 1.16E+06 | 1.142 | 0.325 |
| 171 | Riboflavin                       | C00255     | Other                       | 377.1451 | 1.75 | + | 1.45E+05 | 1.89E+05 | 1.09E+05 | 1.43E+05 | 1.06E+05 | 9.94E+04 | 1.45E+05 | 1.06E+05 | 0.732 | 0.309 |
| 172 | Thioredoxin disulfide            | C00343     | Other                       | 317.0379 | 0.60 | + | 1.94E+05 | 2.48E+05 | 5.62E+04 | 9.20E+04 | 5.65E+04 | 1.07E+05 | 1.94E+05 | 9.20E+04 | 0.474 | 0.242 |
| 173 | S-Acylglutathione                | C02568     | Other                       | 333.0588 | 0.59 | - | 2.91E+04 | 6.89E+04 | 7.40E+04 | 8.99E+04 | 5.99E+04 | 4.44E+04 | 6.89E+04 | 5.99E+04 | 0.855 | 0.738 |
| 174 | Pyridoxamine                     | C00534     | Other                       | 169.0960 | 0.64 | + | 1.91E+06 | 1.55E+06 | 2.58E+06 | 1.26E+06 | 1.24E+06 | 1.33E+06 | 1.91E+06 | 1.26E+06 | 0.657 | 0.070 |
| 175 | 9-Oxononanoic acid               | C16322     | Other                       | 171.1013 | 0.71 | - | 2.33E+05 | 1.68E+05 | 2.69E+05 | 1.61E+05 | 2.31E+05 | 2.21E+05 | 2.33E+05 | 2.21E+05 | 0.948 | 0.635 |
| 176 | N-Amidino-L-aspartate            | C03139     | Other                       | 176.0664 | 0.99 | + | 5.94E+04 | 5.03E+04 | 4.05E+04 | 3.39E+04 | 4.32E+04 | 6.65E+04 | 5.03E+04 | 4.32E+04 | 0.858 | 0.851 |
| 177 | threo-3-Hydroxy-L-aspartate      | C11511     | Other                       | 160.0388 | 0.85 | + | 1.70E+05 | 1.22E+05 | 1.01E+05 | 9.79E+04 | 6.34E+04 | 1.11E+05 | 1.22E+05 | 9.79E+04 | 0.800 | 0.183 |
| 178 | L-Noradrenaline                  | C00547     | Other                       | 170.0816 | 1.73 | + | 9.45E+04 | 1.37E+05 | 1.22E+05 | 9.55E+04 | 1.27E+05 | 1.08E+05 | 1.22E+05 | 1.08E+05 | 0.896 | 0.655 |
| 179 | Hydroxyacetone phosphate         | C03505     | Other                       | 152.9944 | 0.61 | - | 2.99E+05 | 1.92E+05 | 2.18E+05 | 2.80E+05 | 1.50E+05 | 1.51E+05 | 2.18E+05 | 1.51E+05 | 0.692 | 0.470 |
| 180 | N-Acyl-D-aspartate               | C06380     | Other                       | 161.0297 | 0.60 | + | 1.86E+07 | 2.31E+07 | 1.09E+07 | 1.33E+07 | 1.13E+07 | 1.45E+07 | 1.86E+07 | 1.33E+07 | 0.715 | 0.292 |
| 181 | 9-Carboxyhexanoate               | C02656     | Other                       | 161.0900 | 0.69 | + | 0.00E+00 | 2.77E+06 | 4.40E+05 | 6.02E+04 | 5.54E+03 | 0.00E+00 | 4.40E+05 | 6.02E+04 | 0.447 | 0.390 |
| 182 | N-Acetylmethionine               | C02712     | Other                       | 192.0690 | 1.76 | + | 2.07E+05 | 2.49E+05 | 3.37E+05 | 1.40E+05 | 9.86E+04 | 1.49E+05 | 2.49E+05 | 1.40E+05 | 0.561 | 0.031 |
| 183 | 2-Oxo-7-methylthioheptanoic acid | C17220     | Other                       | 191.0767 | 0.61 | + | 6.32E+05 | 3.67E+05 | 5.01E+05 | 2.60E+05 | 2.84E+05 | 2.80E+05 | 5.01E+05 | 2.80E+05 | 0.558 | 0.042 |
| 184 | L-Homocitrulline                 | C02427     | Other                       | 190.1188 | 0.70 | + | 8.38E+05 | 7.79E+05 | 1.49E+06 | 4.05E+05 | 5.88E+05 | 4.90E+05 | 8.38E+05 | 4.90E+05 | 0.547 | 0.079 |
| 185 | Homomethionine                   | C17213     | Other                       | 164.0731 | 0.68 | + | 1.57E+05 | 1.44E+05 | 1.05E+05 | 2.49E+05 | 2.00E+05 | 1.67E+05 | 1.44E+05 | 2.00E+05 | 1.388 | 0.070 |
